# Supplementary figures and images for: Anisotropy reveals contact sliding and aging as a cause of post-seismic velocity changes
Source: Research Square preprint supplement (doi:10.21203/rs.3.rs-5587970/v1), 2025-01-29

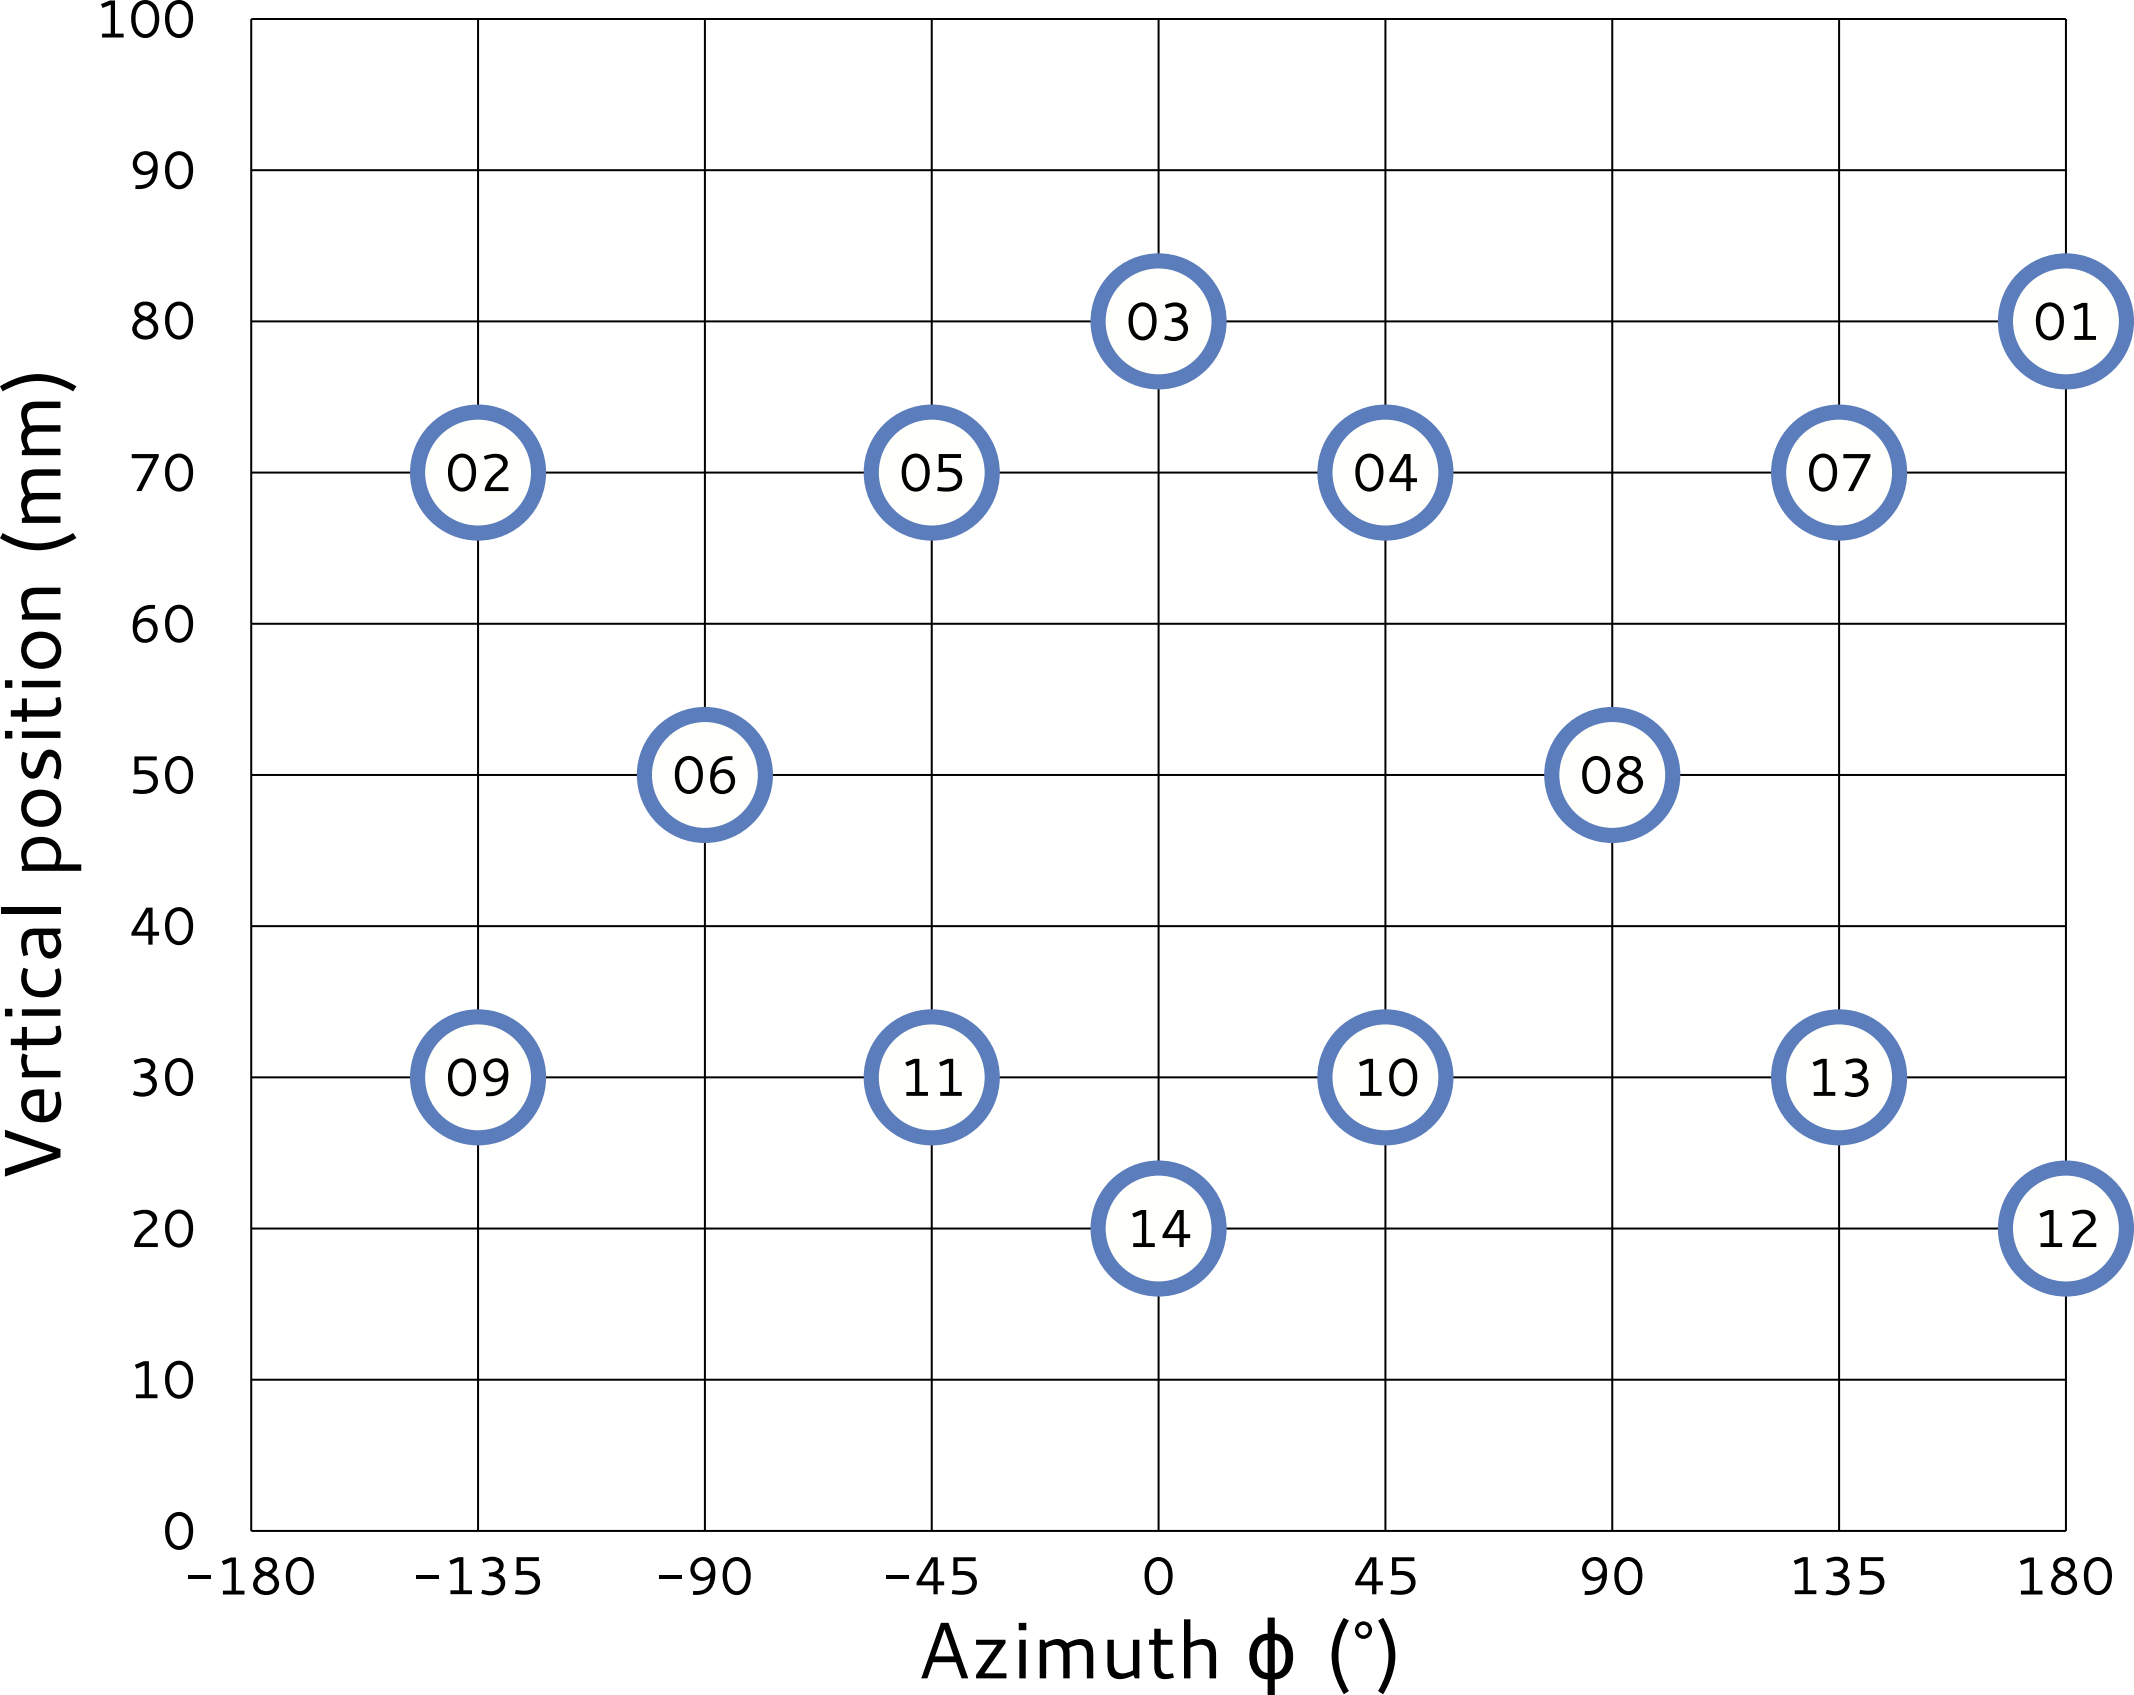

Supplement: Supplementary file 2 [file sensor_map.pdf › code/data/sensor_map.pdf]
